# Supplementary material
Source: publisher figshare collection journal article supplement (https://gsajournals.figshare.com/ndownloader/files/25387715)
Supplement: Supplementary file 1 [file 25387715]

## Sheet: Sheet1
Table S2. Edit information and on-target editing outcomes of MAGESTIC-edited yeast strains.
Sample	gRNA sequence	Barcode sequence	Designed variant	On-target editing status
16_AE2_I3	CAGGTATCCAATTTAAATTA (NGG)	CCTTGGTGCGTGCTCCTTGGCAAATGGATAT	chrXIII_89321_TTAAA_to_CTAAC	Correctedly edited
16_CB6_D11	TATTTCTTTATAAAAACTAC (NGG)	CAGTGGCCCGTGCCGTTTGCCACATGGCCCC	chrXV_19200_A_to_G	Correctedly edited
16_DA5_B10	GCGAACGTGACTACGGGGTG (NGG)	TGTTGCTTAATGAAGCTTGCATTATGACTTA	chrIX_35674_TACGGGGTGCGG_to_CACAGGATGCGA	Correctedly edited
13_CG12_N23	AGCGATAAAGTGGTTTCTTA (NGG)	TCCGATGAGTGTTGTTTCCTGGACCCTGTTA	chrXII_36230_T_to_C	Correctedly edited
16_CB12_D23	CCAAAAGGCTACTATTTTCC (NGG)	CAGTGATACCTGACCTATGGTAATTGCCCTA	chrV_243107_C_to_T	Correctedly edited
16_CB1_D1	AAGTAGTATAATCATGTATT (NGG)	AGTTGCTGAATGGAGTTTGCTATTTGACCTG	chrIX_285902_A_to_G	Correctedly edited
16_CC6_F11	TTGTCAGAATACTAACCCTA (NGG)	TCTTGCCTGTTGGTATTTGCACCCTGATCCA	chrXI_487626_CCTTAG_to_TCTTAA	Correctedly edited
16_DC9_F18	GACATCGTGTTTTGGGGAAT (NGG)	ACTTGGTTAGTGACGACTGGTTAATGCCCAC	chrXII_491710_G_to_T	Correctedly edited
16_DB2_D4	GGAAAAATACGTTCAATTGC (NGG)	TATTGCCATGTGGCTTTTGCCCTTTGCCGAG	chrXI_510202_C_to_T	Correctedly edited
16_DF3_L6	AGAAATGCACTAGTAGGCAA (NGG)	TATTGGTGAGTGCCGCTTGCCAATTGAAATA	chrXII_515006_C_to_G	Designed edit + additional mutation from donor synthetic error
16_DE7_J14	TTGACATTTGATAGGCGGAA (NGG)	TGTTGGTCGGTGGCCCCTGAAGTGTGATCCT	chrXV_562828_G_to_A	Correctedly edited
16_CC10_F19	TTGAGCAGATAAACAACGCA (NGG)	AACTGATTAGTGATTTGTGCAACATGATTAT	chrIV_567417_C_to_T	Correctedly edited
16_CC5_F9	TTGAAAATTTCGAAAGAAAT (NGG)	GTTTGGAGGTTGGATTATGATGTTTGAATCT	chrXI_608676_T_to_C	Correctedly edited
16_CA4_B7	CGTATAAGGAGAAGCCTAAT (NGG)	GTCTGGCTTGTGAATATTGCTATATGACTGT	chrII_753721_TTA_to_CTG	Correctedly edited
16_CB10_D19	CAGTAAAGCACGACCACGTA (NGG)	CATTGGTTAATGCAAGCTGGTTGATGCATGT	chrIX_426032_T_to_C	Unedited
3_DF2_L4	TGATTTAAAAGAAAAGCAAA (NGG)	TTTGTTGTTTGATGTCCATTGTCAGTTGTGT	chrXII_435312_A_to_T	Unedited
